# Supplementary material for: Motion Deblurring of Faces
Source: Springer Nature journal article supplement (doi:10.1007/s11263-018-1138-7), 2018-12-17
Supplement: MOESM1 [file 16348566]

# Supplementary material for the manuscript 'Motion deblurring of faces'

Grigorios G. Chrysos · Paolo Favaro · Stefanos Zafeiriou

Received: date / Accepted: date

## 1 Introduction

This is the supplementary material accompanying the paper 'Motion deblurring of faces'. In the supplementary material, we provide auxiliary experiments and visualizations in order not to clutter the main results in the manuscript.

In Fig. 1 the drawbacks of predefined number averaging are depicted. Namely, in two videos, four different blur levels are illustrated. As it can be noticed, this predefined averaging is an oversimplification even in a single video, since it does not account for the motion in the current frames.

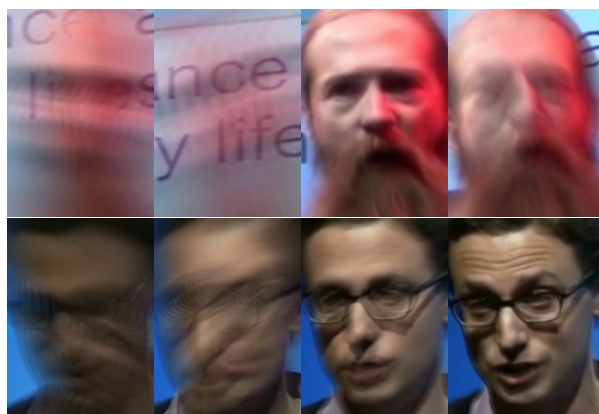

Fig. 1: Four cases from the same clip with a predefined (constant) number of averaging frames (here 15). The frames are put in chronological order from left to right. All four cases vary a lot depending on the movement of the person in each temporal neighborhood. All figures are best viewed in color.

## 2 Experiment with landmark localization

The complete CED plots with all methods visualized for the landmark localization experiment of the manuscript are depicted in Fig. 2 and 3. Similarly, the cumulative distribution for the cosine distances are illustrated in Fig. 4 and 5.

In addition to the state-of-the-art method used for landmark localization in the manuscript, we have additionally experimented with the robust regression method of CFSS of Zhu et al (2015). The rest conventions remain the same as in the manuscript and are not repeated here. The experiments with i) predefined averaging of 11 frames, ii) VLA blurring method were conducted. The results are visualized in table 1 and Fig. 6.

| <i>Method</i>    | PrAvg 11     |                         | VLA          |                         |
|------------------|--------------|-------------------------|--------------|-------------------------|
|                  | <i>AUC</i>   | <i>Failure Rate (%)</i> | <i>AUC</i>   | <i>Failure Rate (%)</i> |
| Pan et al (2016) | 0.660        | 17.492                  | 0.735        | 4.915                   |
| Nah et al (2017) | 0.663        | 17.578                  | 0.742        | 5.584                   |
| ours             | <b>0.679</b> | <b>17.818</b>           | <b>0.770</b> | <b>4.738</b>            |
| blurred          | 0.655        | 17.885                  | 0.729        | 5.848                   |
| oracle           | 0.706        | 16.350                  | 0.800        | 3.981                   |

Table 1: Quantitative results for the landmark localization experiment.

Additional visual results in several images are provided in Fig. 7 - 10.

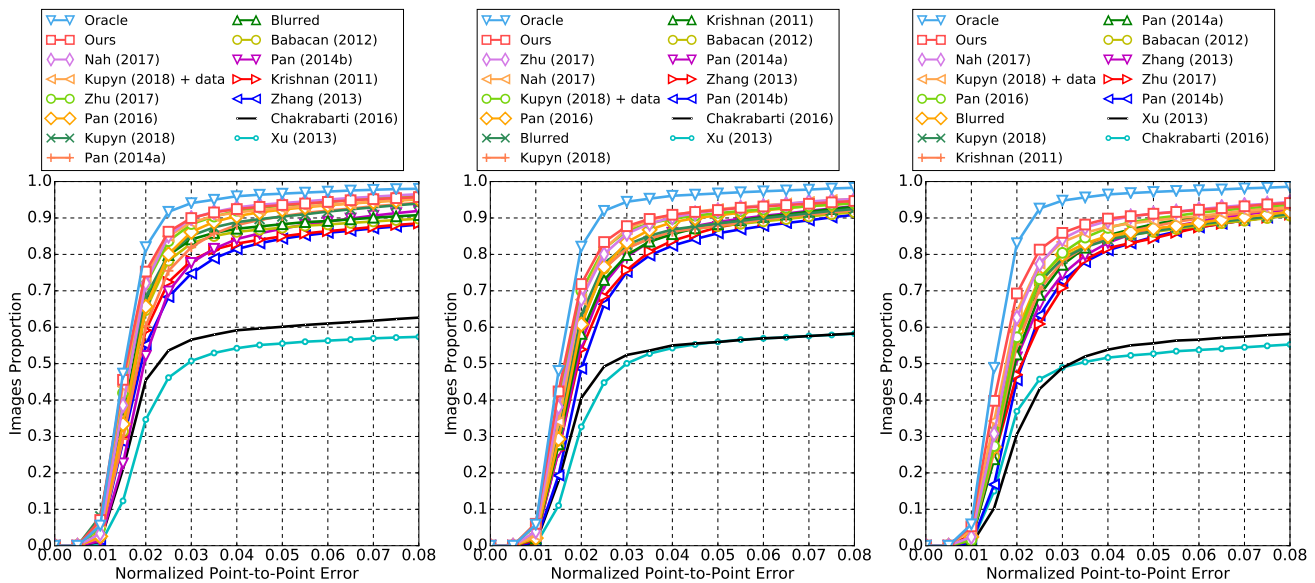

Fig. 2: Auxiliary CED plots for the landmark localization experiment of the manuscript. The legend is ranked based on the AUC. From left to right the plots correspond to the experiments with blurring process: predefined averaging with (a) 7, (b) 11, (c) 15 frames.

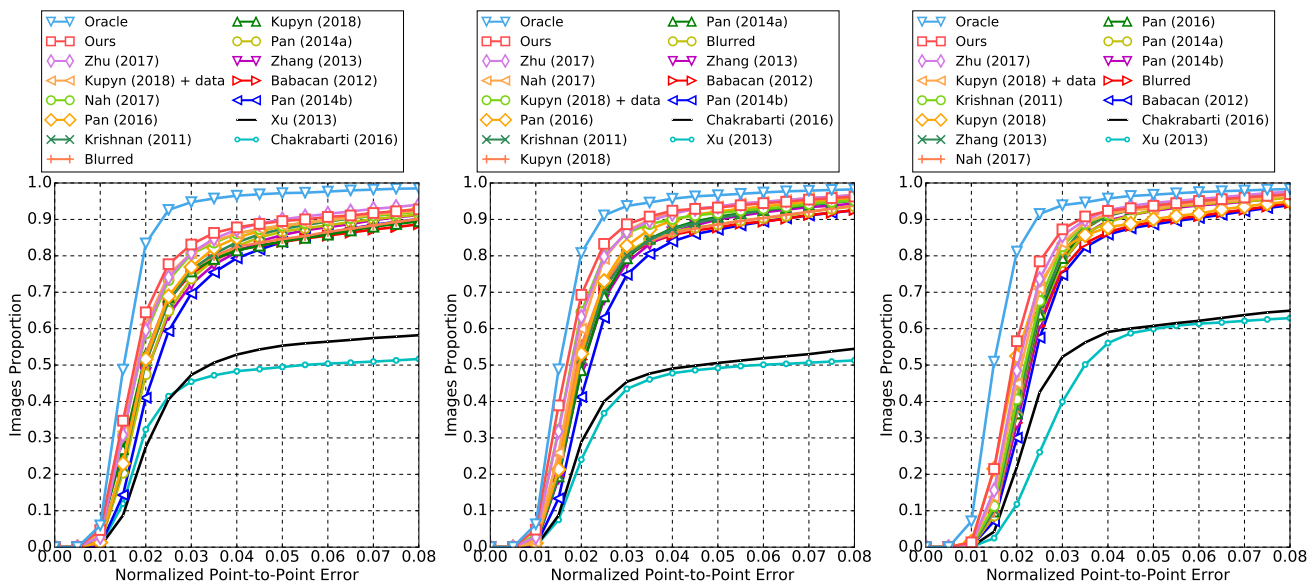

Fig. 3: Auxiliary CED plots for the landmark localization experiment of the manuscript. From left to right the plots correspond to the experiments with blurring process: (a) predefined averaging with 21 frames, (b) VLA, (c) synthetic blur.

## References

- Babacan SD, Molina R, Do MN, Katsaggelos AK (2012) Bayesian blind deconvolution with general sparse image priors. In: Proceedings of European Conference on Computer Vision (ECCV), pp 341–355
- Chakrabarti A (2016) A neural approach to blind motion deblurring. In: Proceedings of European Con-

ference on Computer Vision (ECCV), Springer, pp 221–235

- Krishnan D, Tay T, Fergus R (2011) Blind deconvolution using a normalized sparsity measure. In: IEEE Proceedings of International Conference on Computer Vision and Pattern Recognition (CVPR), pp 233–240

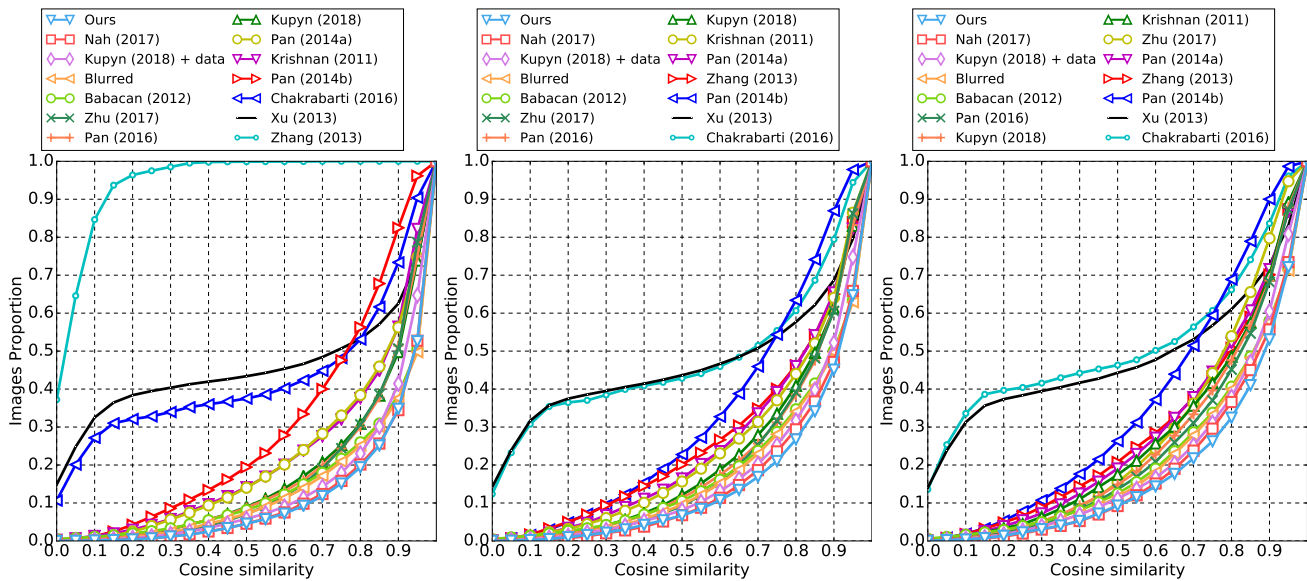

Fig. 4: Auxiliary cumulative cosine distance distributions plots for the landmark localization experiment of the manuscript. The legend is ranked based on the AUC (ascending order). From left to right the plots correspond to the experiments with blurring process: predefined averaging with (a) 7, (b) 11, (c) 15 frames.

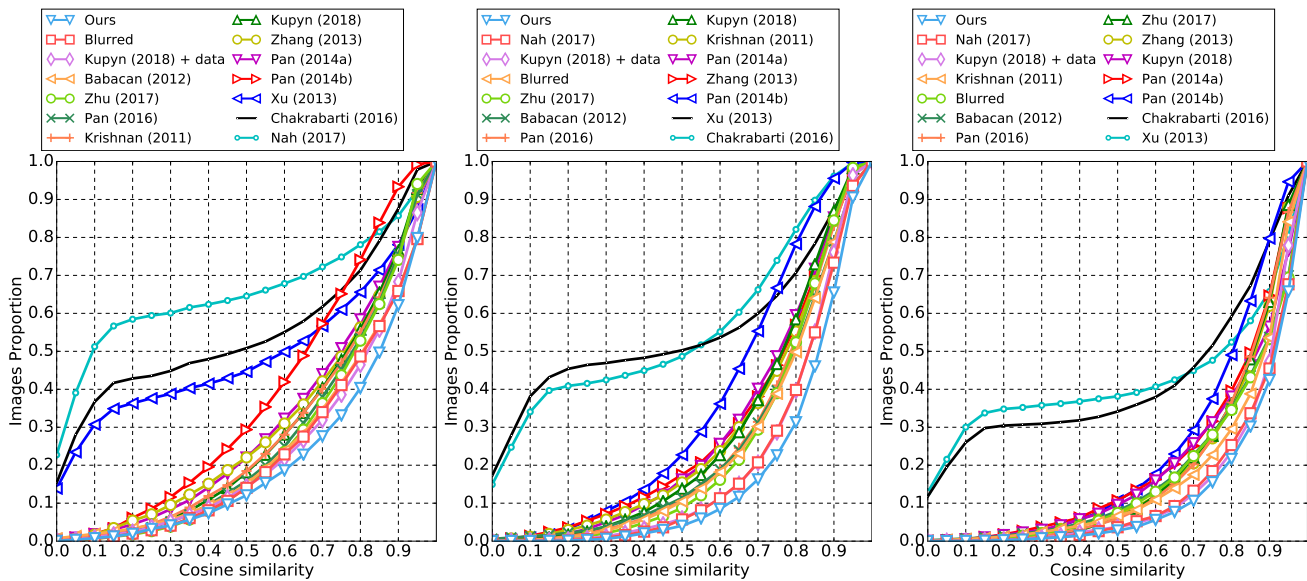

Fig. 5: Part 2 of the auxiliary cumulative cosine distance distributions plots for the landmark localization experiment of the manuscript. From left to right the plots correspond to the experiments with blurring process: (a) predefined averaging with 21 frames, (b) VLA, (c) synthetic blur.

Kupyn O, Budzan V, Mykhailych M, Mishkin D, Matas J (2017) Deblurgan: Blind motion deblurring using conditional adversarial networks. arXiv preprint arXiv:171107064

Nah S, Kim TH, Lee KM (2017) Deep multi-scale convolutional neural network for dynamic scene deblurring. In: IEEE Proceedings of International Conference on Computer Vision and Pattern Recognition

(CVPR)

Pan J, Hu Z, Su Z, Yang MH (2014a) Deblurring face images with exemplars. In: Proceedings of European Conference on Computer Vision (ECCV), pp 47–62

Pan J, Hu Z, Su Z, Yang MH (2014b) Deblurring text images via l0-regularized intensity and gradient prior. In: IEEE Proceedings of International Conference on Computer Vision and Pattern Recognition (CVPR),

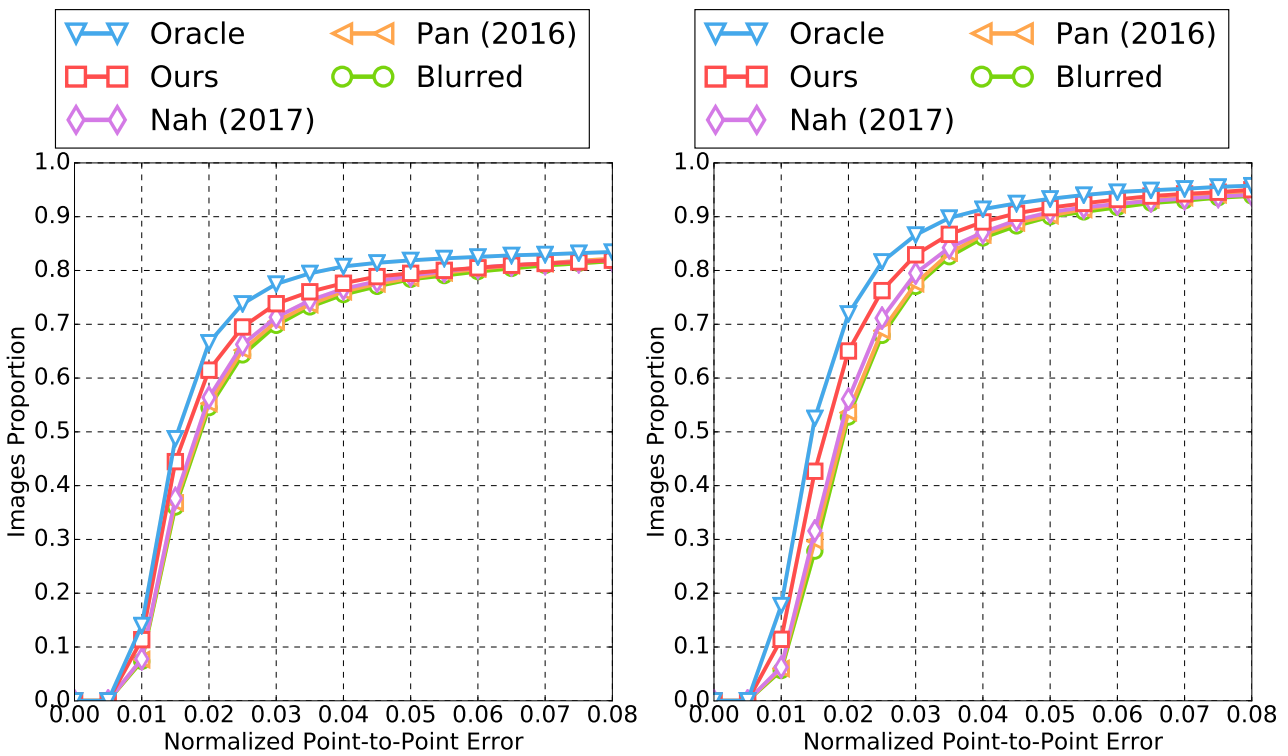

Fig. 6: CED plots for the landmark localization experiment with CFSS localization technique.

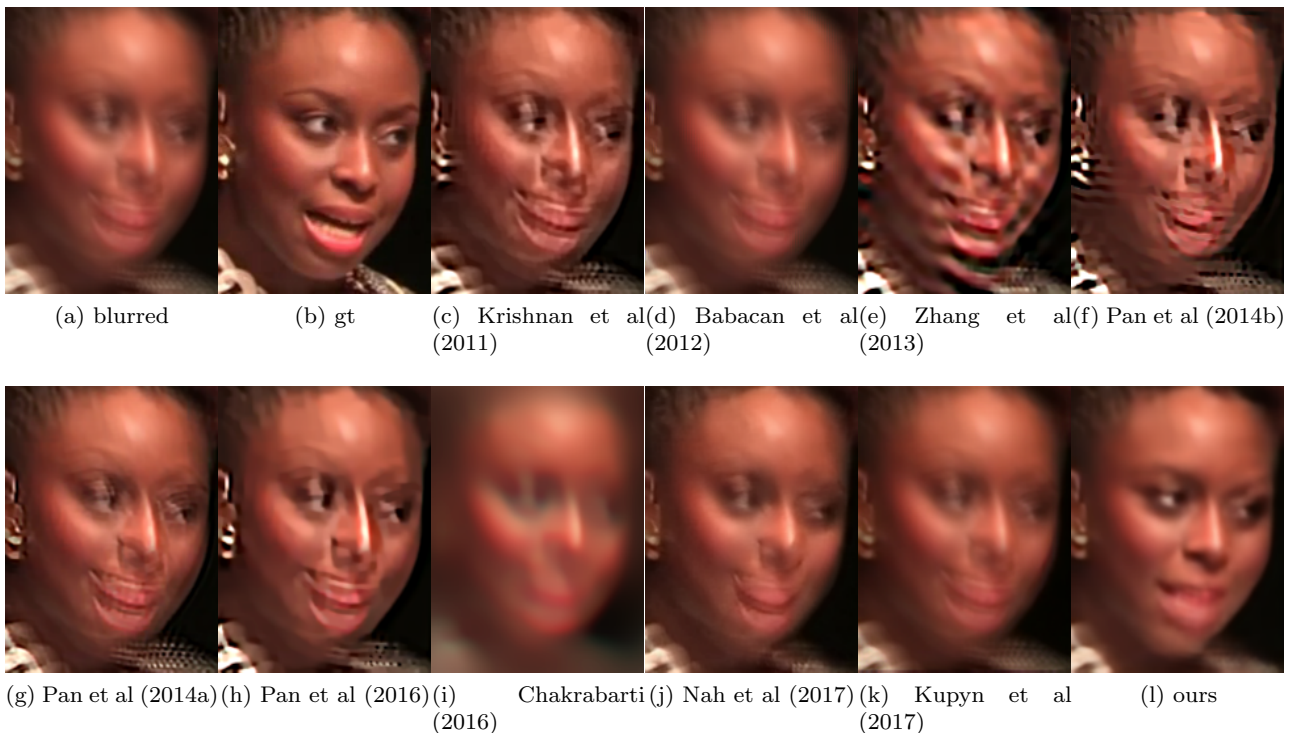

Fig. 7: Qualitative results of deblurring. Despite the severe blur in the mouth region, our method results in a more plausible result than the rest compared methods.

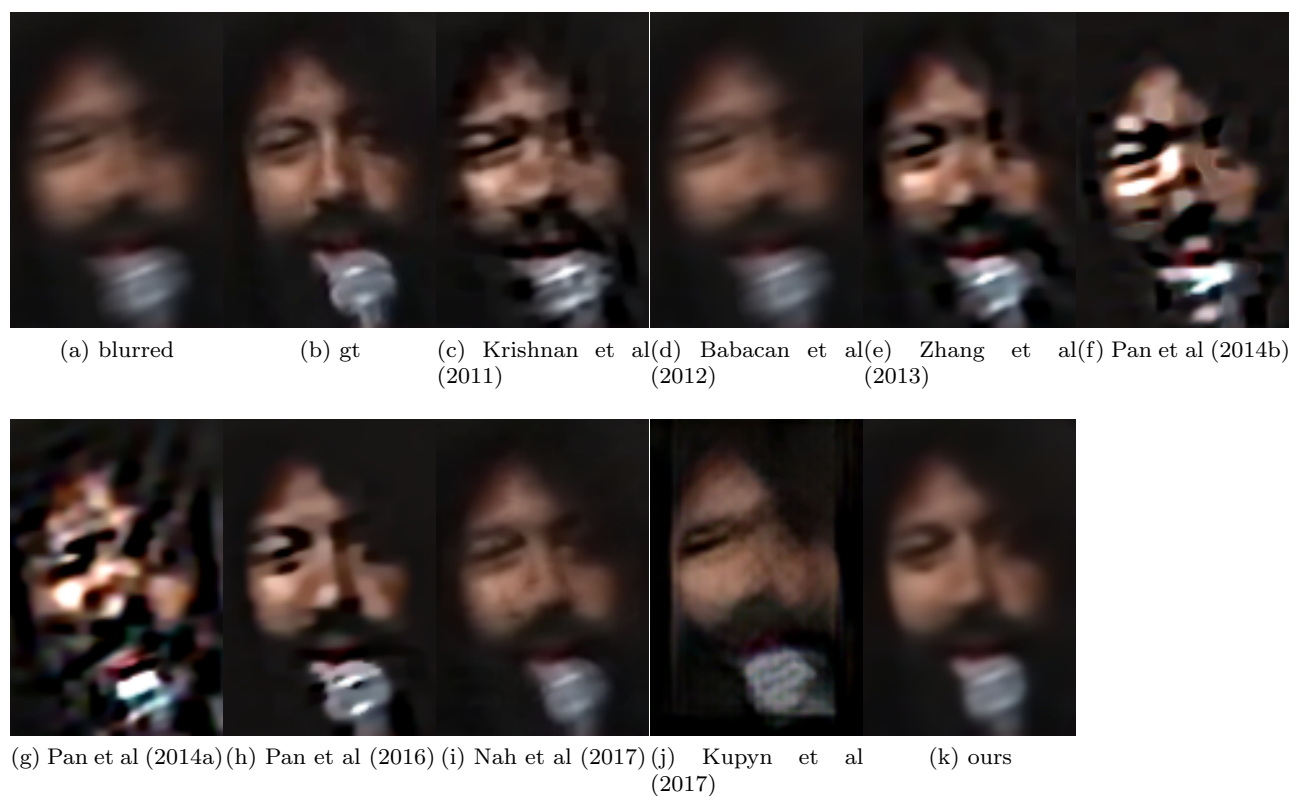

Fig. 8: The strong motion blur is restored by the method of Nah et al (2017) along with ours. However, the method of Nah et al (2017) includes artifacts that our method has avoided.

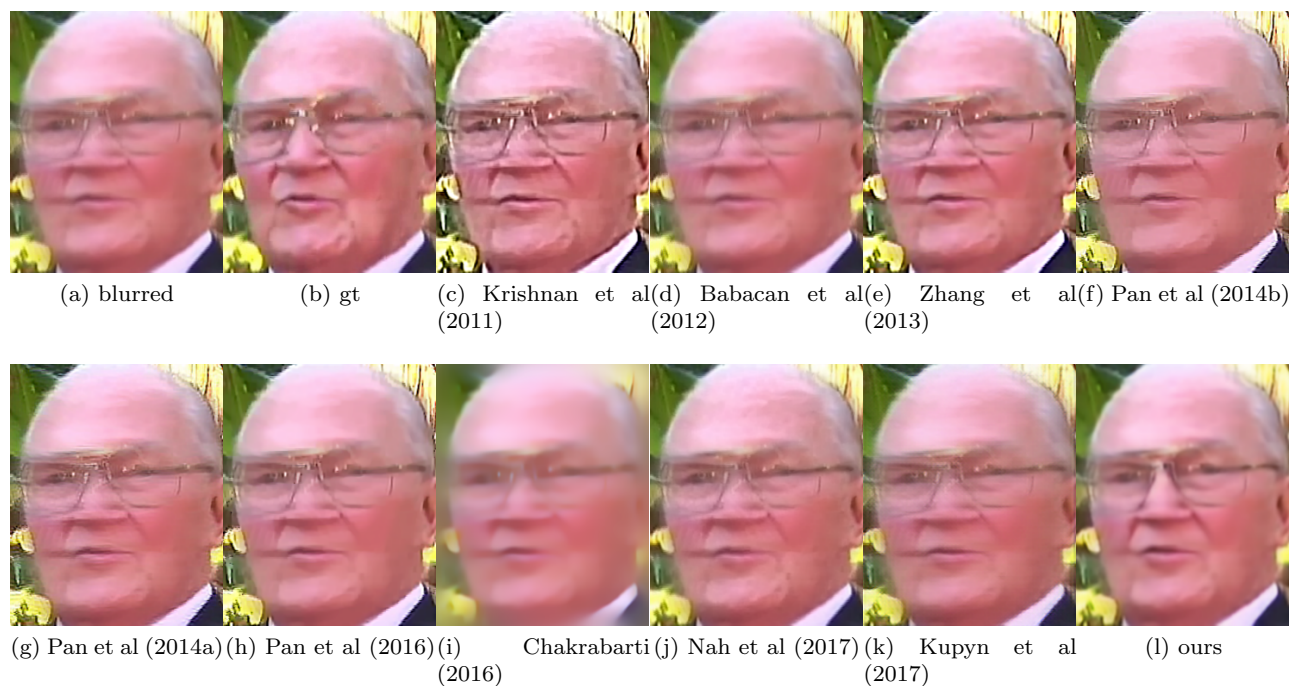

Fig. 9: The majority of the deblurred images include artifacts, e.g. in the right cheek; our image avoids them and yields a sharp result.

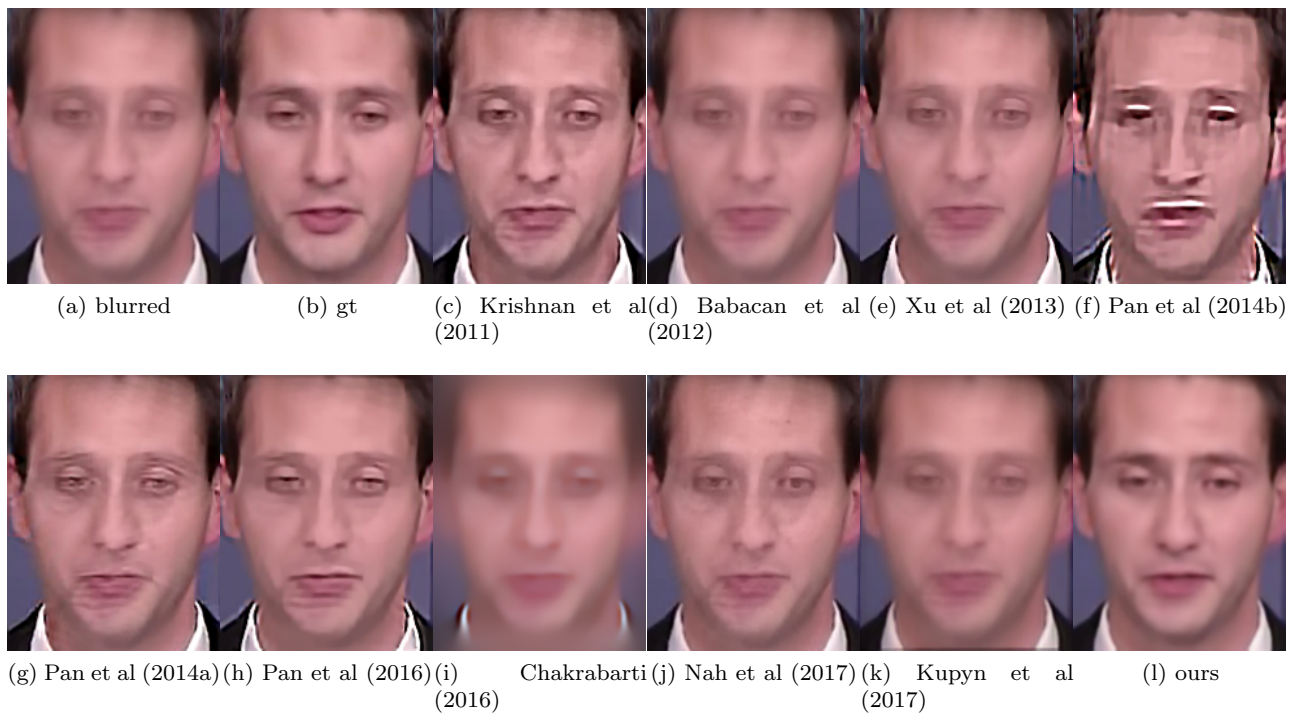

Fig. 10: The blur in this case is mediocre; nevertheless the compared methods fail or result in artifacts. Conversely, the proposed method returns a sharp image.

pp 2901–2908

Pan J, Sun D, Pfister H, Yang MH (2016) Blind image deblurring using dark channel prior. In: IEEE Proceedings of International Conference on Computer Vision and Pattern Recognition (CVPR)

Xu L, Zheng S, Jia J (2013) Unnatural  $l_0$  sparse representation for natural image deblurring. In: IEEE Proceedings of International Conference on Computer Vision and Pattern Recognition (CVPR), pp 1107–1114

Zhang H, Wipf D, Zhang Y (2013) Multi-image blind deblurring using a coupled adaptive sparse prior. In: IEEE Proceedings of International Conference on Computer Vision and Pattern Recognition (CVPR), pp 1051–1058

Zhu S, Li C, Loy CC, Tang X (2015) Face alignment by coarse-to-fine shape searching. In: IEEE Proceedings of International Conference on Computer Vision and Pattern Recognition (CVPR), pp 4998–5006
